# Supplementary material for: Projected increase in amyotrophic lateral sclerosis from 2015 to 2040
Source: PubMed Central journal article supplement (PMC4987527; doi:10.1038/ncomms12408), 2016-08-11
Supplement: ncomms12408-s1.pdf [file ncomms12408-s1.pdf]

## Supplementary Information

**Supplementary Table 1.** Male age-specific prevalence estimates of ALS by country per 100,000 population

| Country                                | Survival Rate | 20-24 | 25-29 | 30-34 | 35-39 | 40-44 | 45-49 | 50-54 | 55-59 | 60-64 | 65-69 | 70-74 | 75-79 | 80-84 | >85                         | 2015 estimated no. of cases  | 2040 estimated no. of cases |
|----------------------------------------|---------------|-------|-------|-------|-------|-------|-------|-------|-------|-------|-------|-------|-------|-------|-----------------------------|------------------------------|-----------------------------|
| <b>Africa</b>                          |               |       |       |       |       |       |       |       |       |       |       |       |       |       |                             |                              |                             |
| Libya                                  | 3.50          | 0.39  | 0.39  | 8.12  | 8.12  | 9.94  | 9.94  | 28.49 | 28.49 | 28.39 | 28.39 | 0.00  | 0.00  | 0.00  | 0.00                        | 198                          | 433                         |
| <b>Americas</b>                        |               |       |       |       |       |       |       |       |       |       |       |       |       |       |                             |                              |                             |
| United States                          | 3.00          | 0.33  | 2.37  | 2.37  | 4.89  | 4.89  | 7.47  | 7.47  | 19.26 | 19.26 | 30.51 | 30.51 | 21.54 | 21.54 | 21.54                       | 12,656                       | 17,184                      |
| Uruguay                                | 4.33          | NA    | 0.95  | 0.95  | 7.49  | 7.49  | 12.21 | 12.21 | 28.58 | 28.58 | 33.25 | 33.25 | 28.06 | 28.06 | 28.06                       | 146                          | 193                         |
| <b>Asia</b>                            |               |       |       |       |       |       |       |       |       |       |       |       |       |       |                             |                              |                             |
| China                                  | 2.25          | 0.00  | 0.00  | 0.36  | 2.07  | 2.21  | 0.68  | 1.62  | 4.07  | 8.98  | 4.32  | 8.10  | 5.81  | 3.44  | 3.44                        | 12,261                       | 17,281                      |
| Iran                                   | 3.25          | 0.23  | 0.00  | 0.68  | 1.85  | 2.63  | 3.15  | 6.47  | 8.68  | 11.02 | 7.25  | 9.13  | 5.33  | 7.74  | 7.74                        | 774                          | 1,699                       |
| Japan                                  | 2.25          | 0.00  | 0.00  | 0.23  | 0.23  | 1.13  | 1.13  | 5.40  | 5.40  | 12.15 | 12.15 | 18.68 | 18.68 | 11.48 | 11.48                       | 3,241                        | 3,558                       |
| Taiwan                                 | 2.25          | 0.95  | 0.88  | 1.17  | 1.64  | 2.90  | 3.44  | 4.55  | 4.95  | 9.05  | 10.15 | 9.32  | 6.32  | 2.07  | 2.07                        | 345                          | 432                         |
| <b>Europe</b>                          |               |       |       |       |       |       |       |       |       |       |       |       |       |       |                             |                              |                             |
| EU28*                                  | 2.39          | 0.24  | 0.72  | 0.72  | 1.43  | 3.35  | 5.26  | 5.74  | 13.62 | 13.38 | 20.79 | 25.57 | 23.18 | 17.69 | 4.78                        | 15,960                       | 19,320                      |
| Serbia                                 | 2.39          | 0.00  | 0.00  | 0.00  | 0.67  | 1.72  | 0.67  | 3.32  | 6.38  | 11.59 | 5.19  | 2.13  | NA    | NA    | NA                          | 74                           | 69                          |
| <b>Oceania</b>                         |               |       |       |       |       |       |       |       |       |       |       |       |       |       |                             |                              |                             |
| New Zealand                            | 2.30          | 1.15  | 1.15  | 1.15  | 1.15  | 1.15  | 1.15  | 8.51  | 8.51  | 24.38 | 24.38 | 41.86 | 41.86 | 17.48 | 17.48                       | 154                          | 226                         |
| <b>Total no. of cases / population</b> |               |       |       |       |       |       |       |       |       |       |       |       |       |       | <b>45,810 / 939 million</b> | <b>60,394 / 1.01 billion</b> |                             |

\*EU28, region consisting of the 28 European Union countries: European Union 28 countries: Austria, Belgium, Bulgaria, Croatia, Cyprus, Czech Republic, Denmark, Estonia, Finland, France, Germany, Greece, Hungary, Ireland, Italy, Latvia, Lithuania, Luxembourg, Malta, the Netherlands, Poland, Portugal, Romania, Slovakia, Slovenia, Spain, Sweden, and the United Kingdom

**Supplementary Table 2.** Female age-specific prevalence estimates of ALS by country per 100,000 population

| Country                                | Survival Rate | 20-24 | 25-29 | 30-34 | 35-39 | 40-44 | 45-49 | 50-54 | 55-59 | 60-64 | 65-69 | 70-74 | 75-79 | 80-84 | >85                            | 2015 estimated no. of cases     | 2040 estimated no. of cases |
|----------------------------------------|---------------|-------|-------|-------|-------|-------|-------|-------|-------|-------|-------|-------|-------|-------|--------------------------------|---------------------------------|-----------------------------|
| <b>Africa</b>                          |               |       |       |       |       |       |       |       |       |       |       |       |       |       |                                |                                 |                             |
| Libya                                  | 3.50          | 0.00  | 0.00  | 2.84  | 2.84  | 7.60  | 7.60  | 13.16 | 13.16 | 7.95  | 7.95  | 8.96  | 8.96  | 8.96  | 8.96                           | 95                              | 202                         |
| <b>Americas</b>                        |               |       |       |       |       |       |       |       |       |       |       |       |       |       |                                |                                 |                             |
| United States                          | 2.42          | 0.00  | 0.19  | 0.19  | 0.87  | 0.87  | 7.21  | 7.21  | 14.83 | 14.83 | 17.93 | 17.93 | 13.41 | 13.41 | 13.41                          | 9,179                           | 12,122                      |
| Uruguay                                | 4.00          | NA    | 0.84  | 0.84  | 2.84  | 2.84  | 4.20  | 4.20  | 11.60 | 11.60 | 10.20 | 10.20 | 6.52  | 6.52  | 6.52                           | 61                              | 76                          |
| <b>Asia</b>                            |               |       |       |       |       |       |       |       |       |       |       |       |       |       |                                |                                 |                             |
| China                                  | 2.50          | 0.00  | 0.35  | 0.33  | 0.55  | 0.30  | 1.15  | 1.95  | 3.53  | 3.50  | 5.88  | 3.80  | 2.55  | 3.25  | 3.25                           | 8,068                           | 12,453                      |
| Iran                                   | 5.00          | 0.00  | 0.85  | 1.10  | 1.25  | 1.45  | 4.25  | 5.30  | 4.55  | 5.65  | 7.40  | 10.55 | 4.25  | 0.00  | 0.00                           | 635                             | 1,293                       |
| Japan                                  | 2.50          | 0.00  | 0.00  | 0.25  | 0.25  | 1.75  | 1.75  | 3.75  | 3.75  | 7.75  | 7.75  | 12.75 | 12.75 | 7.25  | 7.25                           | 2,625                           | 2,873                       |
| Taiwan                                 | 2.50          | 0.53  | 0.43  | 0.68  | 1.83  | 2.70  | 3.45  | 3.25  | 3.75  | 6.35  | 5.08  | 8.00  | 4.25  | 2.60  | 2.60                           | 277                             | 364                         |
| <b>Europe</b>                          |               |       |       |       |       |       |       |       |       |       |       |       |       |       |                                |                                 |                             |
| EU28*                                  | 2.39          | 0.24  | 0.96  | 0.24  | 0.48  | 1.91  | 3.59  | 5.50  | 6.69  | 13.86 | 16.01 | 15.54 | 16.73 | 9.56  | 6.21                           | 13,248                          | 15,704                      |
| Serbia                                 | 2.39          | 0.67  | 0.00  | 0.00  | 0.00  | 1.72  | 1.39  | 1.24  | 0.79  | 7.22  | 5.19  | 3.59  | NA    | NA    | NA                             | 52                              | 48                          |
| <b>Oceania</b>                         |               |       |       |       |       |       |       |       |       |       |       |       |       |       |                                |                                 |                             |
| New Zealand                            | 2.30          | 0.92  | 0.92  | 0.92  | 0.92  | 0.92  | 0.92  | 8.74  | 8.74  | 11.50 | 11.50 | 27.83 | 27.83 | 11.04 | 11.04                          | 111                             | 165                         |
| <b>Total no. of cases / population</b> |               |       |       |       |       |       |       |       |       |       |       |       |       |       | <b>34,352/<br/>949 million</b> | <b>45,299/<br/>1.03 billion</b> |                             |

\*EU28, region consisting of the 28 European Union countries: Austria, Belgium, Bulgaria, Croatia, Cyprus, Czech Republic, Denmark, Estonia, Finland, France, Germany, Greece, Hungary, Ireland, Italy, Latvia, Lithuania, Luxembourg, Malta, the Netherlands, Poland, Portugal, Romania, Slovakia, Slovenia, Spain, Sweden, and the United Kingdom

**Supplementary Table 3.** Epidemiology studies containing age- and sex-specific incidence data used to calculate the projected number of ALS cases

| <b>Study</b>                      | <b>Country/Region</b> | <b>Crude incidence rate<br/>per 100,000</b> | <b>Population size</b> |
|-----------------------------------|-----------------------|---------------------------------------------|------------------------|
| Fong (2005) <sup>1</sup>          | China                 | 0.60                                        | 6,708,389              |
| Logroscino (2010) <sup>2</sup>    | Europe                | 2.16                                        | 23,978,781             |
| Sajjadi (2010) <sup>3</sup>       | Iran                  | 0.42                                        | 4,559,256              |
| Doi (2014) <sup>4</sup>           | Japan                 | 2.20                                        | 103,001,116            |
| Radhakrishnan (1986) <sup>5</sup> | Libya                 | 0.89                                        | 518,745                |
| Murphy (2008) <sup>6</sup>        | New Zealand           | 3.30                                        | 520,280                |
| Alčaz (1996) <sup>7</sup>         | Serbia                | 0.54                                        | 1,602,226              |
| Lai (2008) <sup>8</sup>           | Taiwan                | 1.05                                        | 22,770,000             |
| McGuire (1996) <sup>9</sup>       | United States         | 1.80                                        | 2,559,164              |
| Vazquez (2008) <sup>10</sup>      | Uruguay               | 1.37                                        | 3,241,003              |

## Supplementary References

1. Fong, G. C. *et al.* An epidemiological study of motor neuron disease in Hong Kong. *Amyotroph Lateral Scler Other Motor Neuron Disord* **6**, 164-168 (2005).
2. Logroscino, G. *et al.* Incidence of amyotrophic lateral sclerosis in Europe. *J Neurol Neurosurg Psychiatry* **81**, 385-390 (2010).
3. Sajjadi, M. *et al.* Epidemiology of amyotrophic lateral sclerosis in Isfahan, Iran. *Eur J Neurol* **17**, 984-989 (2010).
4. Doi, Y., Atsuta, N., Sobue, G., Morita, M. & Nakano, I. Prevalence and incidence of amyotrophic lateral sclerosis in Japan. *J Epidemiol* **24**, 494-499 (2014).
5. Radhakrishnan, K., Ashok, P. P., Sridharan, R. & Mousa, M. E. Descriptive epidemiology of motor neuron disease in Benghazi, Libya. *Neuroepidemiology* **5**, 47-54 (1986).
6. Murphy, M., Quinn, S., Young, J., Parkin, P. & Taylor, B. Increasing incidence of ALS in Canterbury, New Zealand: A 22-year study. *Neurology* **71**, 1889-1895 (2008).
7. Alčaz, S. *et al.* Epidemiological and clinical characteristics of ALS in Belgrade, Yugoslavia. *Acta Neurol Scand* **94**, 264-268 (1996).
8. Lai, C. H. & Tseng, H. F. Epidemiology and medical expenses of motor neuron diseases in Taiwan. *Neuroepidemiology* **31**, 159-166 (2008).
9. McGuire, V., Longstreth, W. T., Jr., Koepsell, T. D. & van Belle, G. Incidence of amyotrophic lateral sclerosis in three counties in western Washington state. *Neurology* **47**, 571-573 (1996).
10. Vazquez, M. C. *et al.* Incidence and prevalence of amyotrophic lateral sclerosis in Uruguay: a population-based study. *Neuroepidemiology* **30**, 105-111, (2008).
